# Supplementary material
Source: MDPI journal article supplement (https://www.mdpi.com/2673-8716/2/4/27)

Single  $10^6$  timestep simulation  
for each  $\beta$

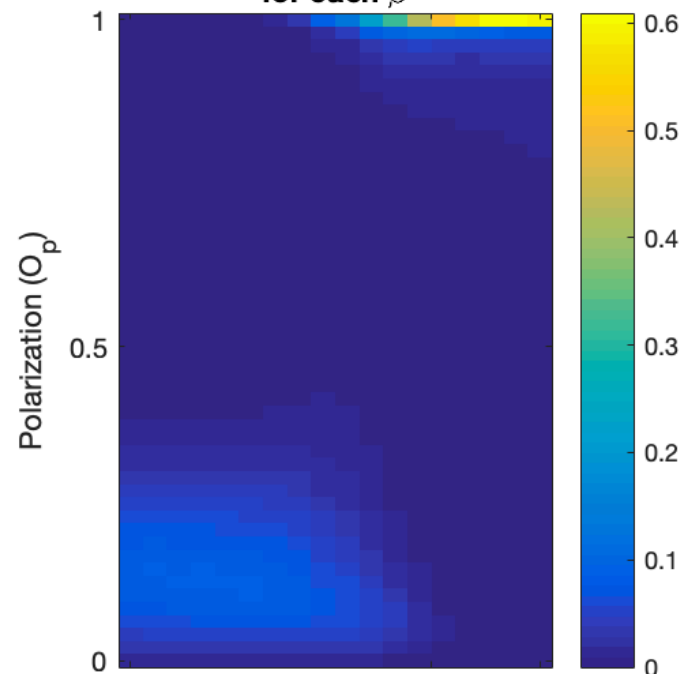

Mean over 12 different simula-  
tions for each  $\beta$

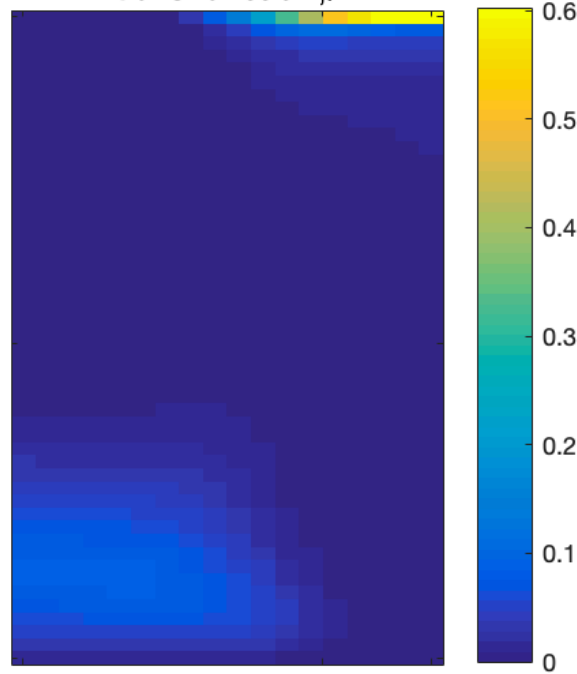

Standard deviation over 12 different  
simulations for each  $\beta$

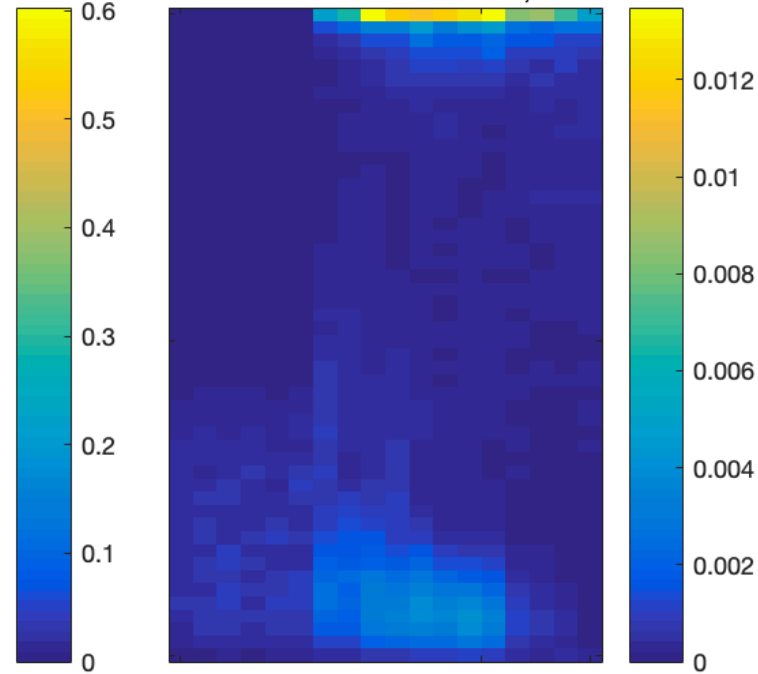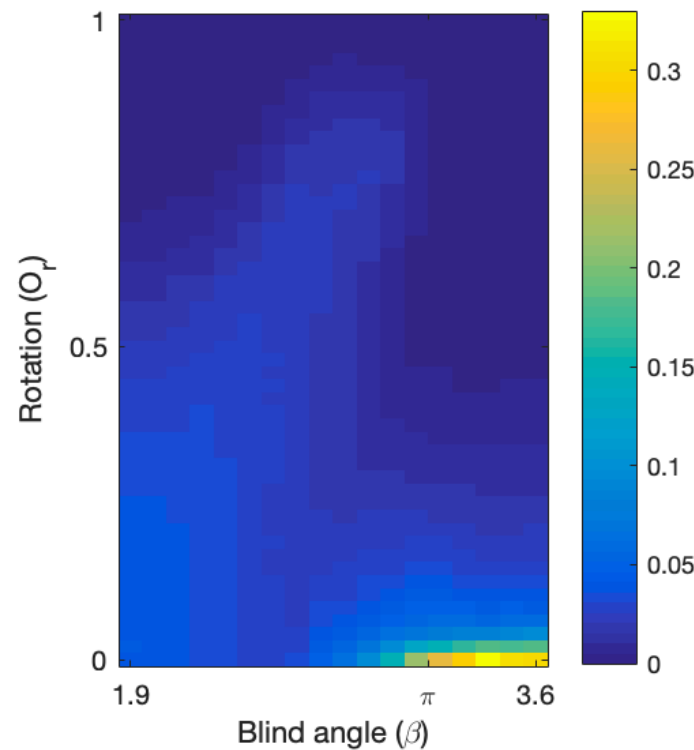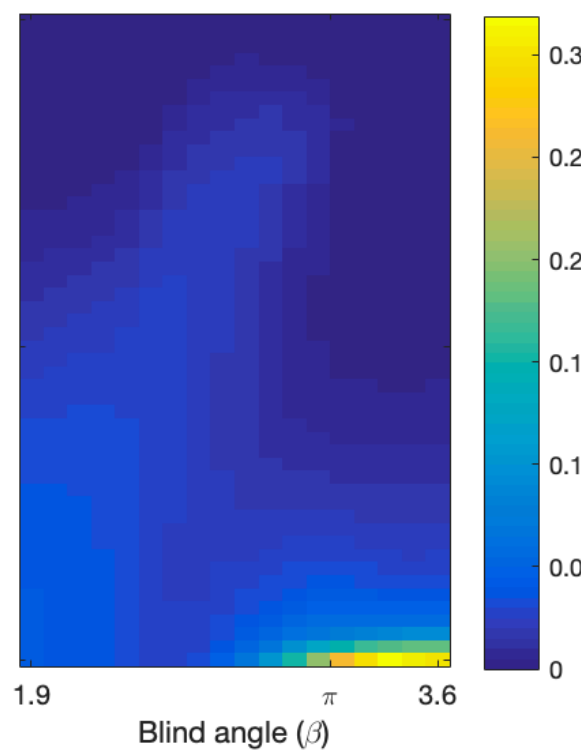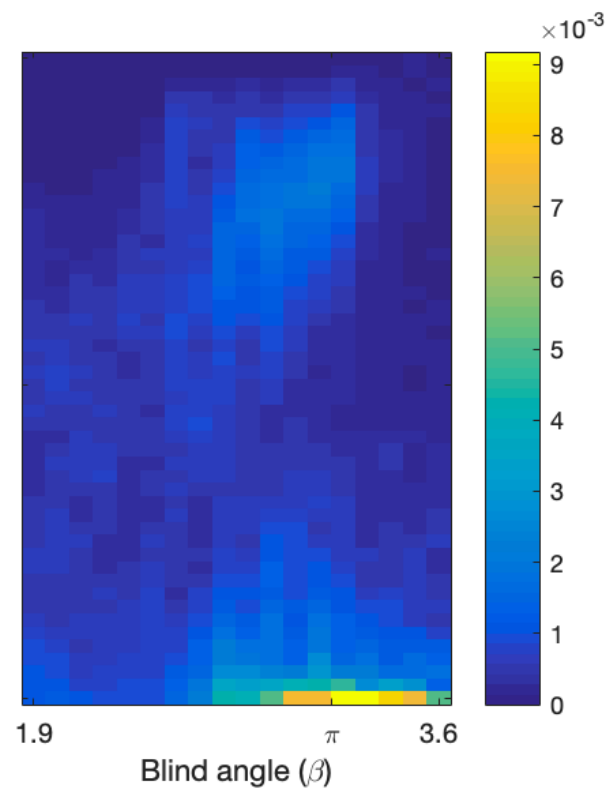

Supplement: s1 [file s1]
