# Supplementary material
Source: MDPI journal article supplement (https://www.mdpi.com/2673-8716/2/4/27)

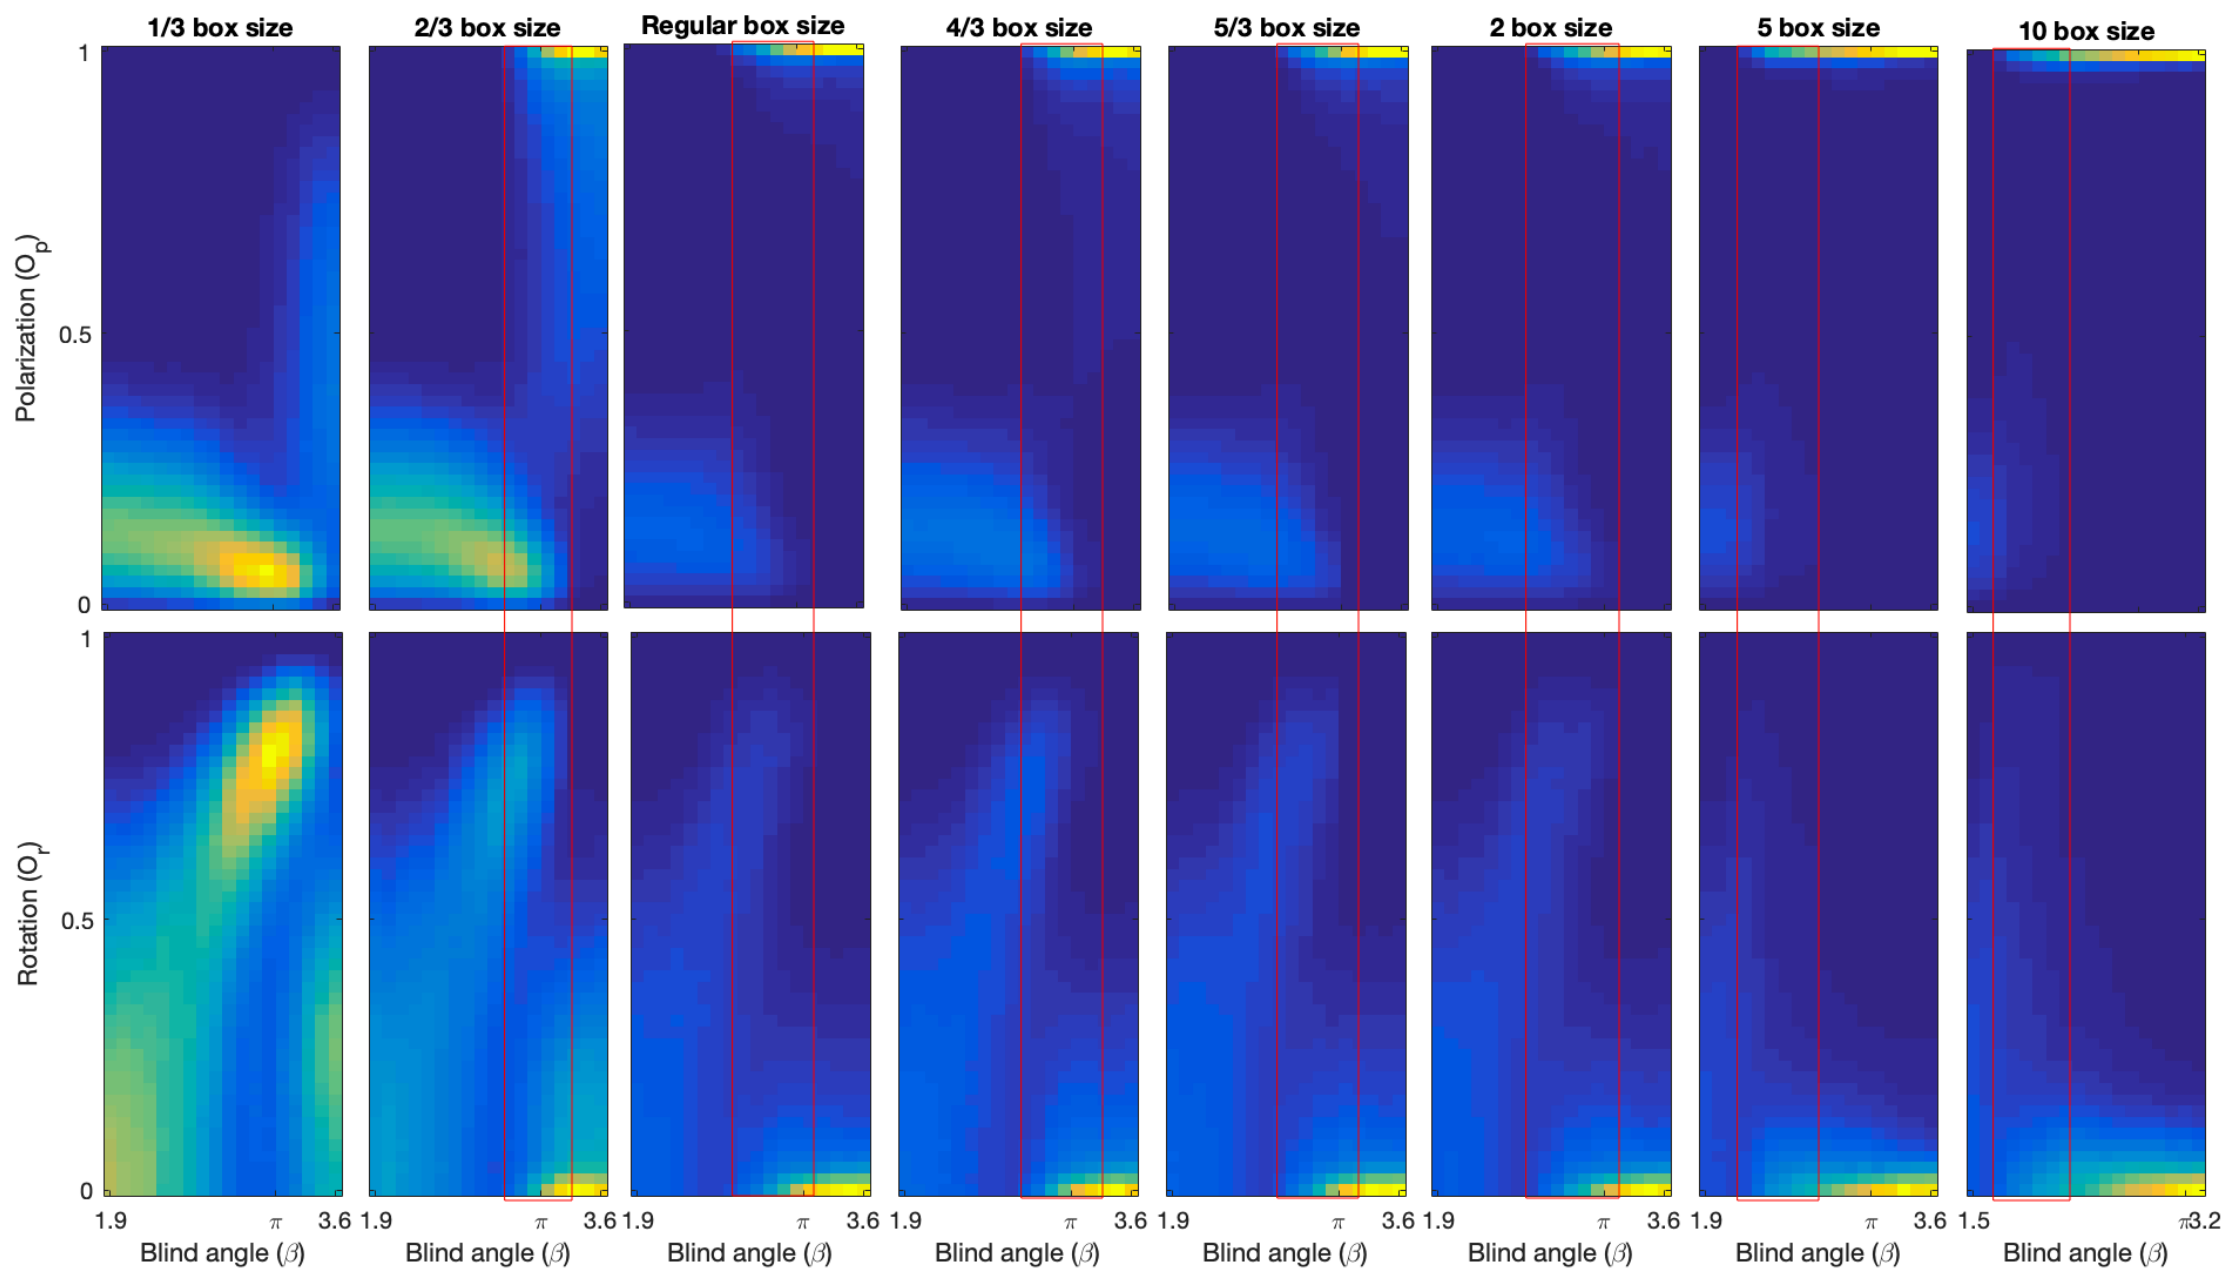

Supplement: s1 [file s1]

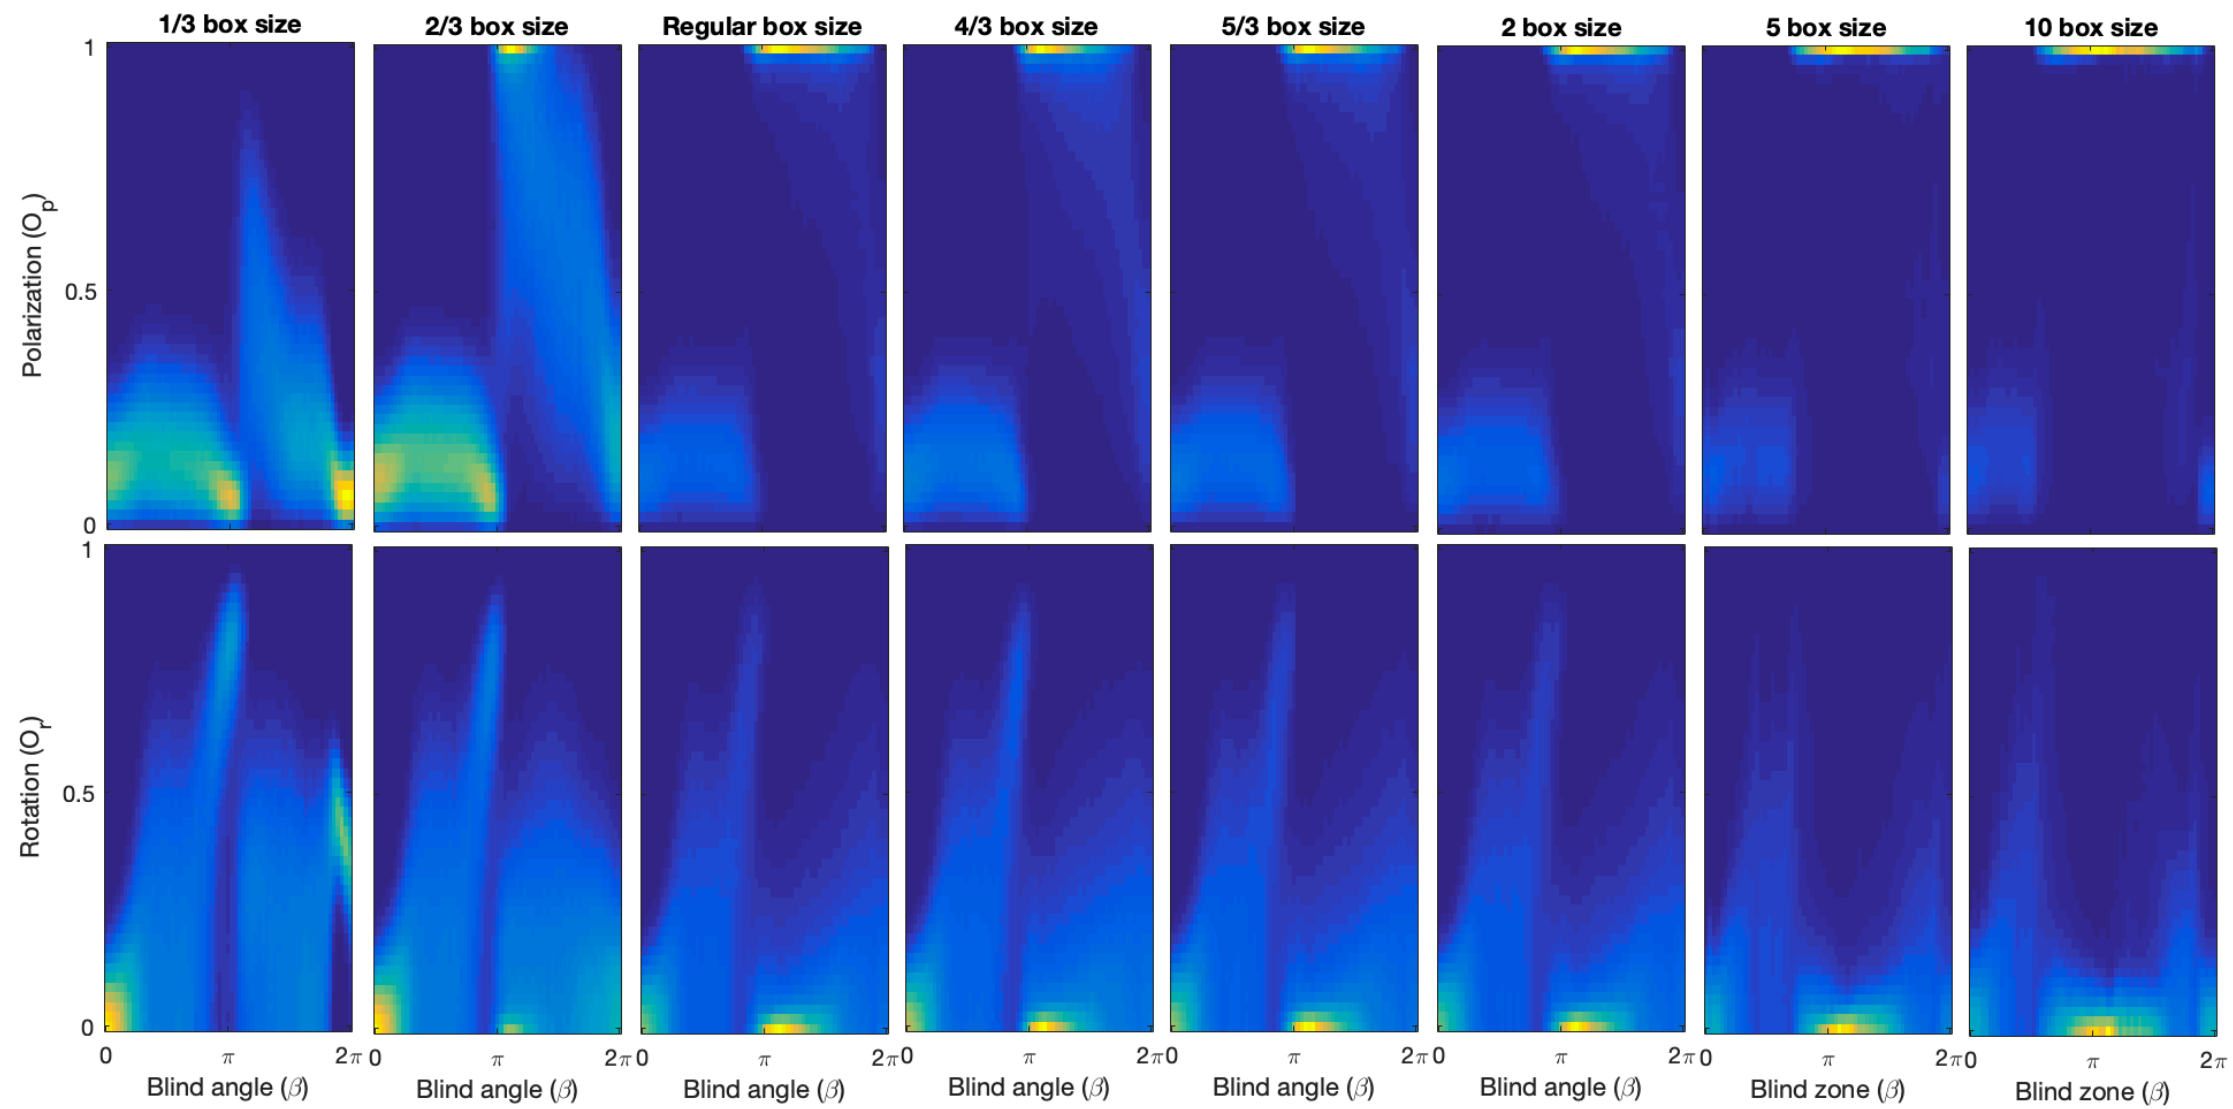

Supplement: s1 [file s1]
